1 **Investigating the Role of Chromatin Remodeler FOXA1 in Ferroptotic**  
2 **Cell Death**

3

4 Emilie Logie<sup>1</sup>, Louis Maes<sup>1</sup>, Joris Van Meenen<sup>2</sup>, Peter De Rijk<sup>3,4</sup>, Mojca  
5 Strazisar<sup>3,4</sup>, Geert Joris<sup>3,4</sup>, Bart Cuypers<sup>5</sup>, Kris Laukens<sup>5</sup>, Wim Vanden  
6 Berghe<sup>1\*</sup>

7 1. *Laboratory of Protein Science, Proteomics and Epigenetic Signaling (PPES) and*  
8 *Integrated Personalized and Precision Oncology Network (IPPON), Department*  
9 *of Biomedical Sciences, University of Antwerp, Campus Drie Eiken,*  
10 *Universiteitsplein 1, Wilrijk, Belgium*

11 2. *Antwerp Research Group for Ocular Science (ARGOS), Department of*  
12 *Translational Neurosciences, University of Antwerp, Wilrijk, Belgium*

13 3. *Neuromics Support Facility, VIB Center for Molecular Neurology, VIB, Antwerp,*  
14 *Belgium*

15 4. *Neuromics Support Facility, Department of Biomedical Sciences, University of*  
16 *Antwerp, Antwerp, Belgium*

17 5. *Biomedical Informatics Network Antwerp (Biomina), Department of Computer*  
18 *Science, University of Antwerp, Wilrijk, Belgium*

19

20 \* Corresponding author: [wim.vandenberghe@uantwerpen.be](mailto:wim.vandenberghe@uantwerpen.be)

21 Conflict of Interest: The authors declare no conflict of interest.

22

23

24

## 25 Investigating the Role of Chromatin Remodeler FOXA1 in Ferroptotic 26 Cell Death

27 Ferroptosis is a lipid peroxidation-dependent mechanism of regulated cell death known to  
28 suppress tumor proliferation and progression. Although several genetic and protein hallmarks  
29 have been identified in ferroptotic cell death, it remains challenging to fully characterize  
30 ferroptosis signaling pathways and to find suitable biomarkers. Moreover, changes taking place  
31 in the epigenome of ferroptotic cells remain poorly studied. In this context, we aimed to  
32 investigate the role of chromatin remodeler forkhead box protein A1 (FOXA1) in RSL3-treated  
33 multiple myeloma cells because, similar to ferroptosis, this transcription factor has been  
34 associated with changes in the lipid metabolism, DNA damage, and epithelial-to-mesenchymal  
35 transition (EMT). RNA sequencing and Western blot analysis revealed that FOXA1 expression  
36 is consistently upregulated upon ferroptosis induction in different *in vitro* and *in vivo* disease  
37 models. *In silico* motif analysis and transcription factor enrichment analysis further suggested that  
38 ferroptosis-mediated FOXA1 expression is orchestrated by specificity protein 1 (Sp1), a  
39 transcription factor known to be influenced by lipid peroxidation. Remarkably, FOXA1  
40 upregulation in ferroptotic myeloma cells did not alter hormone signaling or EMT, two key  
41 downstream signaling pathways of FOXA1. CUT&RUN genome-wide transcriptional binding  
42 site profiling showed that GPX4-inhibition by RSL3 triggered loss of binding of FOXA1 to  
43 pericentromeric regions in multiple myeloma cells, suggesting that this transcription factor is  
44 possibly involved in genomic instability, DNA damage, or cellular senescence under ferroptotic  
45 conditions.

46 **Keywords:** FOXA1; forkhead box; ferroptosis; multiple myeloma; perichromatin

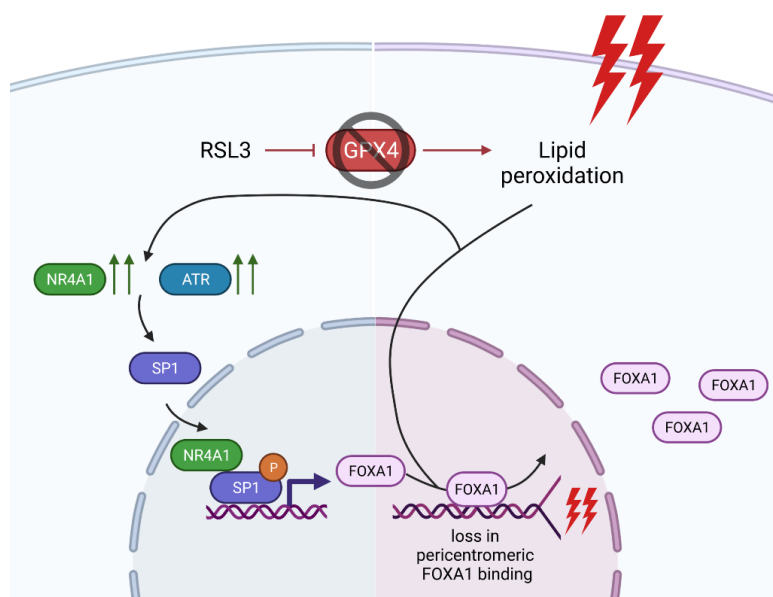

47

48

## 49 **Introduction**

50 Ferroptosis is a non-apoptotic mode of regulated cell death (RCD) characterized by an  
51 iron-dependent rise in reactive oxygen species (ROS) that propagate lipid peroxidation  
52 reactions [1]. Mechanistically, intracellular increases in labile ferrous iron ( $\text{Fe}^{2+}$ )  
53 challenge the cellular anti-oxidant defense systems by triggering the formation of toxic  
54 hydroxyl radicals through Fenton and Fenton-like chemistry [2]. Should enzymatic anti-  
55 oxidants, such as superoxide dismutase or glutathione peroxidases, fail to eliminate these  
56 toxic by-products, excessive peroxidation of polyunsaturated fatty acids (PUFAs) will  
57 ensue and ultimately cause detrimental loss of membrane integrity [3]. Several  
58 pathologies, including neurodegenerative diseases, cardiovascular diseases, ischemia-  
59 reperfusion injuries, and diabetes, have already been associated with ferroptotic cell death  
60 [4-8]. Small molecules targeting ferroptosis signaling pathways have therefore gained  
61 considerable clinical interest in the past couple of years [9]. Interestingly, the induction  
62 of ferroptosis has also demonstrated to offer therapeutic potential, especially in the field  
63 of oncology. One of the major hallmarks of cancer cells includes evasion of apoptotic cell  
64 death due to (acquired) therapy resistance mechanisms [10]. Provoking non-apoptotic  
65 modes of cell death, such as ferroptosis or necroptosis, might therefore help in eliminating  
66 therapy-resistant cancer (stem) cells [11]. Additionally, compared to healthy tissue,  
67 malignant tumors heavily rely on an increased iron metabolism to sustain their augmented  
68 proliferation capacity, exposing them to higher basal levels of oxidative stress [12].  
69 Further elevating intracellular  $\text{Fe}^{2+}$  concentrations with ferroptotic compounds might  
70 further disturb their precarious redox balance and efficiently promote cell death [13]. For  
71 example, several B-cell malignancies, including multiple myeloma (MM) and B-cell  
72 lymphomas, portray an increased iron uptake and display sensitivity to ferroptosis  
73 inducers [14-20].

74 On a molecular level, genetic and protein hallmarks of ferroptosis have been identified  
75 and are mainly involved in oxidative stress pathways (NRF2, GPX4, CHAC1) [17, 21,  
76 22], iron metabolism (TFRC, FTH1) [23, 24], inflammation (PTGS2) [17], and lipid  
77 metabolism (ACSL4) [25]. The overexpression or downregulation of these genes have  
78 been considered as potential biomarkers of ferroptosis cell death, yet it remains  
79 challenging to find ferroptosis-specific markers [26]. ACSL4, for instance, is currently  
80 considered to be a specific driver for ferroptotic cell death as it is involved in enhancing  
81 PUFA content in phospholipid bilayers, which are most susceptible to lipid peroxidation

82 [25, 27]. However, a recent study by Chu and colleagues has demonstrated that even  
83 ACSL4-depleted cells can undergo p53-mediated ferroptosis [28]. Thus, there is an unmet  
84 need for finding more precise and specific contributors of ferroptotic cell death. A  
85 (combination of) suitable ferroptosis biomarker(s) might not only offer new insights in  
86 designing novel therapies for iron-related diseases, but might also aid in early detection  
87 of ferroptotic cells [29]. Moreover, it could help identify ferroptosis-resistant cancers,  
88 which, unfortunately, have already been identified as well [30-33].

89 In the present study, we investigated the role of chromatin remodeler forkhead box A1  
90 (FOXA1) in MM cells undergoing ferroptotic cell death. FOXA1 belongs to a large  
91 family of FOX pioneer TFs that, unlike most TFs, can access target sequences located on  
92 nucleosomes and on some forms of compacted chromatin [34]. It is believed that  
93 members of the FOXA subfamily stably bind to genomic regions prior to activation and  
94 prior to binding of other TFs, and promote ATP-independent chromatin opening to allow  
95 binding of other TFs, nucleosome remodelers, or chromatin modifiers [34]. In case of  
96 FOXA1, it is suggested that chromatin opening is promoted by simultaneous DNA- and  
97 core histone binding (through a C-terminal domain), which disrupts local  
98 internucleosomal interactions required for stability of higher-order chromatin structure  
99 [35]. Depending on its chromatin recruitment sites, FOXA1 plays a role in embryonic  
100 development [35], hormone regulation [36, 37], lipid metabolism [38, 39], epithelial-to-  
101 mesenchymal transition (EMT) [40, 41], and DNA damage [42]. Given that the three  
102 latter processes have directly been linked to ferroptosis sensitivity or ferroptotic cell death  
103 [27, 43, 44], we combined RNA and CUT&RUN sequencing to characterize FOXA1  
104 expression profiles and downstream targets in different ferroptosis models.

105

## 106 **Results**

### 107 *Ferroptotic Cell Death Promotes FOXA1 expression in Different Disease Models*

108 Although inhibition and induction of ferroptotic cell death is extensively being studied as  
109 a therapeutic strategy in several disease models, finding suitable ferroptosis biomarkers  
110 remains challenging [26]. To identify key genetic hallmarks of ferroptosis signaling  
111 pathways, we compared publicly available RNAseq data (GSE104462) of erastin-treated  
112 HEPG2 liver cancer cells to our own RNAseq data of RSL3-treated MM1 myeloma  
113 cancer cells (awaiting GEO accession number). Despite considerable differences in  
114 experimental design and starting material (Table 1), we found 23 common significant

115 (FDR < 0.05 & | log<sub>2</sub>FC > 1 |) differentially expressed genes (DEGs) that displayed a  
 116 similar pattern in gene expression upon ferroptosis induction (Figure 1a). These genes are  
 117 mainly involved in metal binding (YPEL5, ZBTB10, MT2A, MT1F, MT1X), DNA  
 118 binding (BHLHE41, FOXA1, MAFF, KLF2, NR4A2), protein ubiquitination (HERPUD,  
 119 PELI1, FBXO32), calcium ion binding (STX11, JAG1), and protein dephosphorylation  
 120 (DUSP4, DUSP5). Interestingly, we could identify the ATP-independent chromatin  
 121 remodeler FOXA1 as one of the common genes between both RNAseq datasets. FOXA1  
 122 is a 473 amino acid long TF that belongs to the family of FOX pioneer TFs. Through its  
 123 winged forkhead domain (FKHD), it is able to open chromatin by disrupting  
 124 internucleosomal interactions (Figure 1b). In agreement with the RNAseq data, qPCR  
 125 and Western blot analysis revealed a time-dependent upregulation of FOXA1 expression  
 126 in therapy-resistant and – sensitive MM1 cells treated with RSL3, a class II ferroptosis  
 127 inducer (Figure 2a-c). As prolonged treatment with RSL3 results in decreased cell  
 128 viability, these data suggest that FOXA1 expression is tied to severity of ferroptotic cell  
 129 death and GPX4 inhibition (Figure 2b).  
 130 Given that we detected ferroptosis-mediated FOXA1 induction in two different cell types  
 131 (i.e. MM1 and HEPG2), we questioned whether similar observations could be made in *in*  
 132 *vivo* ferroptosis models. To this end, we performed Western blot analysis on liver samples  
 133 isolated from GPX4 liver-specific inducible knockout mice (Supplementary Figure S1).  
 134 LoxP-GPX4 homozygous mice carrying the *cre* transgene (Cre Tg/+) demonstrated an  
 135 increased, yet not significant, FOXA1 protein expression compared to their healthy  
 136 controls (Cre +/+) (Figure 2d). Taken together, these findings suggest that FOXA1  
 137 upregulation may be a universal phenomenon in different ferroptotic (disease) models  
 138 and that FOXA1 might be a central regulator in ferroptosis signaling.

139

140 *Table 1: Overview of experimental design differences in public RNAseq data vs own RNAseq data*

| <b>Feature</b>                 | <b>Public RNAseq data<br/>(GSE104462)</b>          | <b>Our RNAseq data</b>       |
|--------------------------------|----------------------------------------------------|------------------------------|
| Cell line                      | HEPG2                                              | MM1S & MM1R                  |
| Tissue of origin               | Liver                                              | Peripheral blood             |
| Ferroptosis inducer            | 10 μM erastin<br>(inhibits Xc <sup>-</sup> system) | 5 μM RSL3<br>(inhibits GPX4) |
| Duration ferroptosis treatment | 24 hr                                              | 3 hr                         |
| Ferroptosis inhibitor          | 1 μM ferrostatin-1                                 | 2 μM ferrostatin-1           |

141

142

143

Abbreviations: Xc<sup>-</sup> system, Cystine/glutamate transporter; GPX4, Glutathione peroxidase 4.

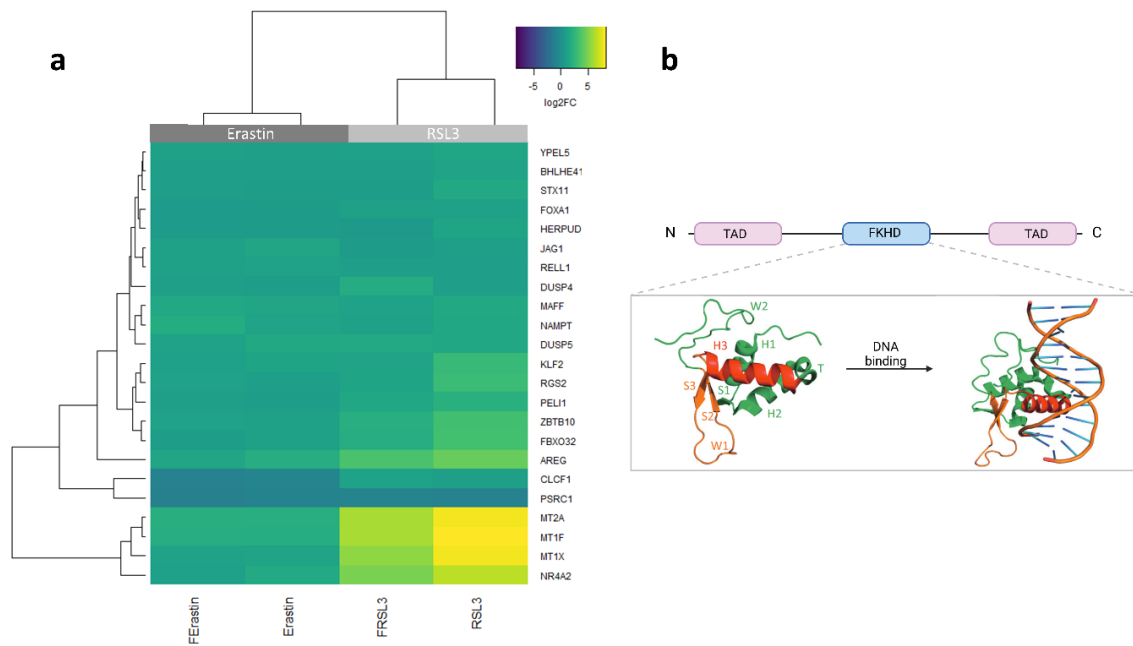

144

145 *Figure 1: (a)* Heatmap representation of common differentially expressed genes ( $FDR < 0.05$ ,  $\log_2FC > |1$   
146  $)$  between erastin-treated HEPG2 cells (publicly available data GSE104462) and RSL3-treated MM1 cells.  
147  $N=3$  biologically independent replicates per cell line. *(b)* Schematic overview of Forkhead box A1  
148 (FOXA1) protein domains. The forkhead domain (FKHD) is crucial for DNA binding and consists of 3  $\alpha$ -  
149 helices (H1-3) and 3  $\beta$ -sheets (S1-3) organized in a helix-turn-helix motif. This motif is flanked on both  
150 sides by polypeptide chain “wings” (W1-2) that interact with the minor DNA groove.

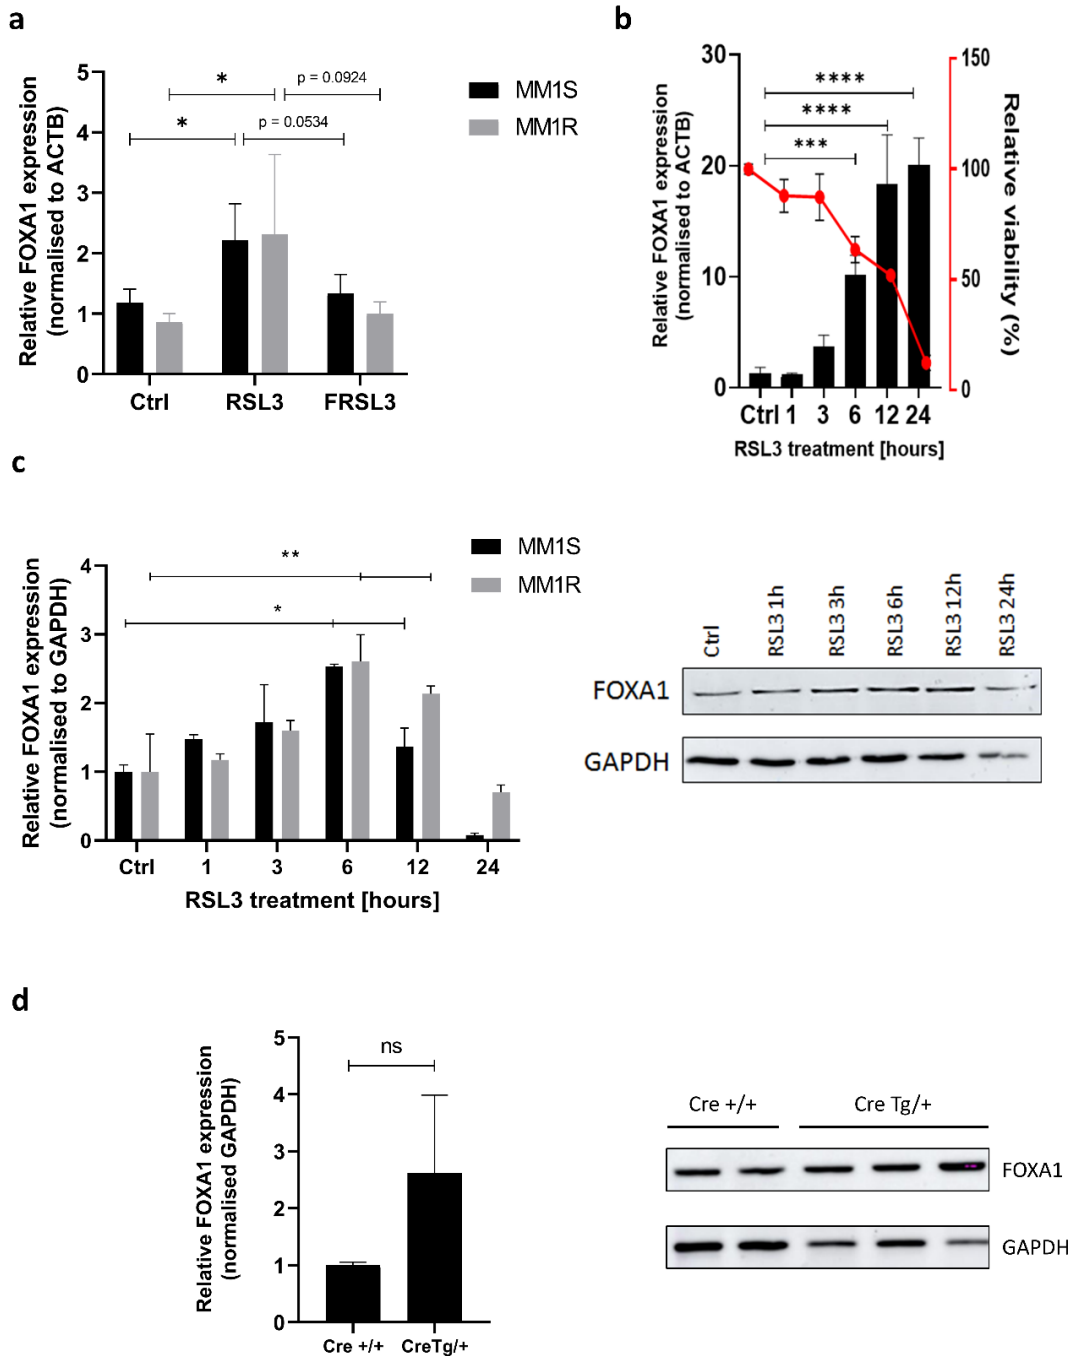

151  
 152 **Figure 2:** (a) Relative FOXA1 mRNA expression in MM1R and MM1S cells treated with 5  $\mu$ M RSL3 for  
 153 3 hrs with (FRSL3) or without (RSL3) 2 hr pre-treatment with 2  $\mu$ M ferrostatin-1 compared to untreated  
 154 controls. FOXA1 expression is normalized against the  $\beta$ -actin (ACTB) housekeeping gene. Data are plotted  
 155 as the mean  $\pm$  s.d.,  $n=3$  biologically independent samples per cell line (\* $p < 0.05$ ), ANOVA). (b) Relative  
 156 mRNA FOXA1 expression and cell viability (%) in MM1 cells after RSL3 treatment. FOXA1 expression  
 157 is normalized against ACTB mRNA expression. Data are plotted as the mean  $\pm$  s.d.,  $n=3$  biologically  
 158 independent samples per cell line (\*\* $p < 0.001$ , \*\*\*\* $p < 0.0001$ , ANOVA). (c) Western blot detection  
 159 and quantification of FOXA1 and GAPDH expression levels in MM1 cells treated with RSL3. Data are  
 160 plotted as the mean  $\pm$  s.d.,  $n=3$  biologically independent samples. (d) Western blot detection and  
 161 quantification of FOXA1 and GAPDH expression levels in liver samples from healthy Cre +/+ mice versus  
 162 sick Cre Tg/+ mice. Data are plotted as the mean  $\pm$  s.d.,  $n= 2$  Cre +/+ mice and 3 Cre Tg/+ mice (ns =  $p >$   
 163 0.05, two-tailed t-test).



165 ***FOXA1 Binding to Pericentromeric DNA Regions is Reduced Under Ferroptotic***  
166 ***Conditions***

167 A PubMed search of all articles featuring the FOXA1 transcription factor revealed that  
168 FOXA1 expression is mostly associated with hormone signaling in prostate, breast and  
169 testis cancer (Supplementary Figure S2). Therefore, RNAseq data was further explored  
170 to assess whether expression of nuclear hormone receptors is significantly altered in  
171 ferroptotic MM1 cells. Supplementary Figure S3 demonstrates that most hormone  
172 receptors, including estrogen (ESR), glucocorticoid (NR3C1), retinoid X (RXR), and  
173 peroxisome proliferator-activated receptors (PPAR) remain largely unaltered upon RSL3  
174 treatment. Similarly, we could not detect significant differences in ferroptosis sensitivity  
175 in glucocorticoid-sensitive MM1S cells, expressing NR3C1, versus glucocorticoid-  
176 resistant MM1R cells, lacking functional NR3C1 expression. In contrast, an increase in  
177 mRNA expression of lipid and oxidative metabolism sensing orphan nuclear receptors  
178 NR4A1, NR4A2, and NR4A3 could be observed in RSL3-treated cells compared to  
179 untreated controls, and was partly validated by Western blot (Supplementary Figure S4).  
180 The interplay between FOXA1 and orphan nuclear receptors has only poorly been  
181 characterized, mostly in context of dopaminergic neurons [45, 46]. Interestingly,  
182 important tumor suppressor roles for NR4A TFs have recently been described (reviewed  
183 in [47]), and NR4A defects are reported to promote formation of blood-tumors (e.g.  
184 leukemia, lymphoma) and T-cell immunity dysfunctions [48-51]. As such, possible anti-  
185 tumor functions of NR4A TFs in ferroptotic cells deserves further investigation.  
186 We next explored whether FOXA1 might play a role in epithelial-to-mesenchymal  
187 transition (EMT) as reported in previous studies [40, 41, 52]. Correlation analysis of the  
188 RNAseq data indeed demonstrated that genes highly correlated with FOXA1 expression  
189 were enriched in cytoskeleton organization, epithelial cell differentiation, and regulation  
190 of EMT (Figure 3a-c). Interestingly, the EMT status is known to directly affect ferroptosis  
191 sensitivity, with mesenchymal cells being more susceptible to ferroptotic cell death  
192 compared to epithelial cells [43]. Ferroptosis-mediated upregulation of FOXA1 might  
193 subsequently drive MM1 cells towards a mesenchymal profile and promote cell death by  
194 RSL3. To this end, qPCR analysis of four key EMT markers was performed on MM1  
195 cells treated with RSL3 for increasing timepoints (Supplementary Figure S5). Overall, no  
196 significant expression differences of epithelial marker E-cadherin (E-CAD) or  
197 mesenchymal markers N-cadherin (N-CAD), Twist-related protein 1 (TWIST1) or Snail  
198 Family transcriptional repressor 2 (SLUG) could be observed in ferroptotic cells. These



199 preliminary results indicate that FOXA1 does not orchestrate trans-differentiation of  
200 MM1 cells into a mesenchymal phenotype.

201 Since our targeted approaches did not further elucidate the role of FOXA1 in ferroptosis  
202 signaling, we aimed to characterize the downstream effects of FOXA1 by performing  
203 CUT&RUN sequencing. This technique allows for genome-wide profiling of chromatin  
204 binding sites of transcription factors, similar to ChIP-Seq [53]. In short, MM1R cells were  
205 treated for 3 hours with 5  $\mu$ M RSL3, after which FOXA1-bound DNA fragments were  
206 collected and purified for downstream analysis. After completing library preparation and  
207 DNA sequencing, enriched regions were called using the sparse enrichment analysis for  
208 CUT&RUN (SEARC) [54]. Only a limited number of genomic regions ( $n = 43$ ) were  
209 identified to be differentially altered in FOXA1 binding after RSL3 treatment  
210 (Supplementary Table S2). Although we previously measured higher FOXA1 expression  
211 in ferroptotic cells, untreated controls displayed higher FOXA1 binding compared to  
212 RSL3-treated cells (Supplementary Table S2). Remarkably, all identified regions were  
213 located in pericentromeric DNA (Figure 4a-b), suggesting that a ferroptosis-mediated loss  
214 of FOXA1 binding to pericentromeric hetero-chromatin takes place upon RSL3  
215 induction. Given that FOXA1 is a pioneer TF that is able to bind compact DNA, these  
216 observations could indicate that DNA decondensation (of pericentromeric regions)  
217 triggers genome-wide loss of FOXA1 binding. In line with these results, we previously  
218 found (unpublished data) that ferroptosis might induce early cellular senescence in MM1  
219 cells, a process which has been associated with defective pericentric silencing and  
220 decondensation [55, 56]. Preliminary Western blot analysis of RSL3-treated MM1R cells  
221 confirmed the observed loss of FOXA1 expression in chromatin-bound cellular protein  
222 fractions (Figure 5). In parallel, cytoplasmic protein expression of FOXA1 was slightly  
223 increased upon RSL3 exposure, indicating that chromatin-free FOXA1 is transported  
224 toward the cytoplasmic compartment (Figure 5).

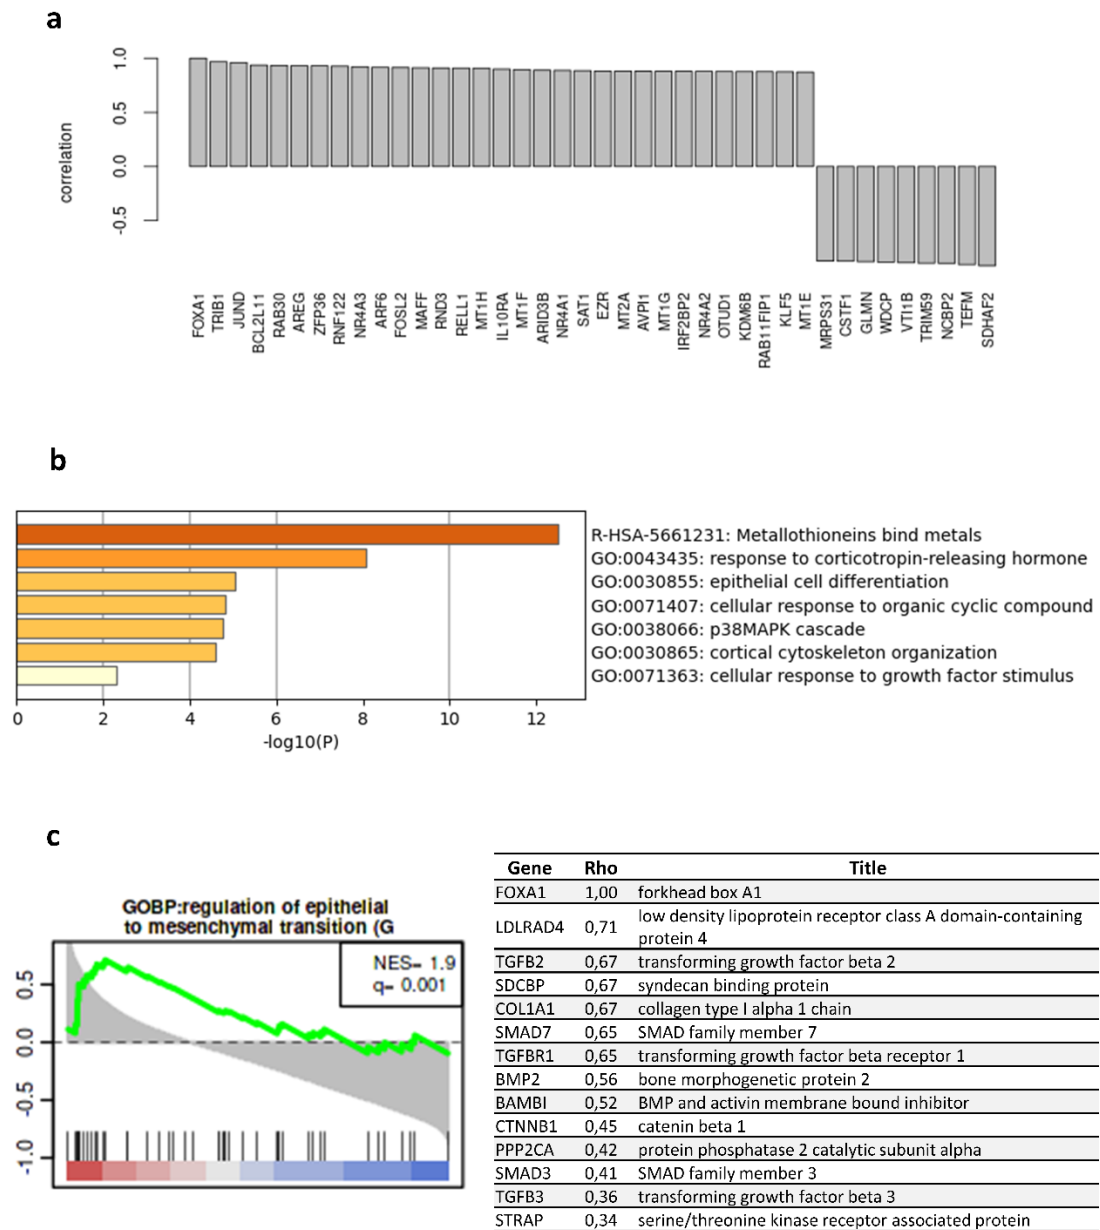

225

226

227

228

229

230

231

232

233

234

235

236

237

**Sp1 is a Possible Driver of FOXA1 Expression**

Taking into account that FOXA1 is upregulated under different ferroptotic conditions in different cell lines, we investigated whether a common transcription factor drives expression of FOXA1. To this end, we generated a list of potential FOXA1 driver genes by identifying transcription factor binding sites located in the FOXA1 promoter region

238

239

240

241

242 obtained from the SwissRegulon database [58]. Next, a target list of each of the candidate  
243 drivers was constructed using three different databases, namely IFTP, TRRUSR, and  
244 Marbach2016, employed in the tftarget R package [59]. Finally, an overlap between  
245 candidate driver target genes and significant DEGs identified in the two RNAseq studies  
246 was performed. Our analysis showed that transcription factor Sp1 is the most probable  
247 driver in FOXA1 expression, both in MM1R cells and HEPG2 cells (Table 2).

248

249

Table 2: Top 5 candidate drivers of FOXA1 expression in ferroptotic cells.

| Candidate driver | # DEGs in RNAseq data regulated by candidate driver | % DEGs in RNAseq regulated by candidate driver |
|------------------|-----------------------------------------------------|------------------------------------------------|
| Sp1              | 46                                                  | 82.14                                          |
| SPI1             | 36                                                  | 64.29                                          |
| TFAP2A           | 33                                                  | 58.93                                          |
| TFAP2C           | 31                                                  | 55.36                                          |
| RREB1            | 30                                                  | 55.57                                          |

250

Abbreviations: Sp1, Sp1 transcription factor; SPI1, Spi-1 proto-oncogene; TFAP2A, Transcription factor AP-2  
251 alpha; TFAP2C, Transcription factor AP-2 gamma; RREB1, Ras responsive element binding protein 1

252

253 Although other studies have reported a ferroptosis-dependent increase in Sp1 expression  
254 [7, 60, 61], we did not find significant alterations in Sp1 mRNA levels in RSL3-treated  
255 MM1 cells compared to untreated controls (Figure 6a). Nonetheless, preliminary  
256 experiments demonstrate that siRNA silencing of Sp1 abolishes ferroptosis-driven  
257 FOXA1 upregulation (Figure 2a, Figure 6b), suggesting that Sp1 (partly) drives FOXA1  
258 upregulation in MM1 cells.

259

260

Possibly, ferroptotic triggers regulate Sp1 transcriptional activity through alternative  
261 mechanisms and subsequently promote downstream FOXA1 expression. In agreement  
262 with this hypothesis, a recent kinome screen has revealed that Sp-1 upstream ATR  
263 phosphorylation is known to directly impact Sp-1 dependent transcription [63] and might  
264 be increased in ferroptotic cells. Alternatively, ferroptosis signaling pathways could  
265 increase expression of Sp1 cofactors and promote Sp1 target site binding. NR4A1 is a  
266 cofactor of Sp1 that has recently been described in ferroptotic cell death [64] and was  
267 also found to be upregulated in this study. Through its interaction with Sp1, NR4A1 might  
268 recruit Sp1 more efficiently to its GC-rich gene targets and promote transcription [65].  
269 Further research exploring the Sp1-FOXA1 signaling axis during ferroptosis are needed  
270 to fully confirm the role of Sp1 in RSL3-dependent FOXA1 expression.

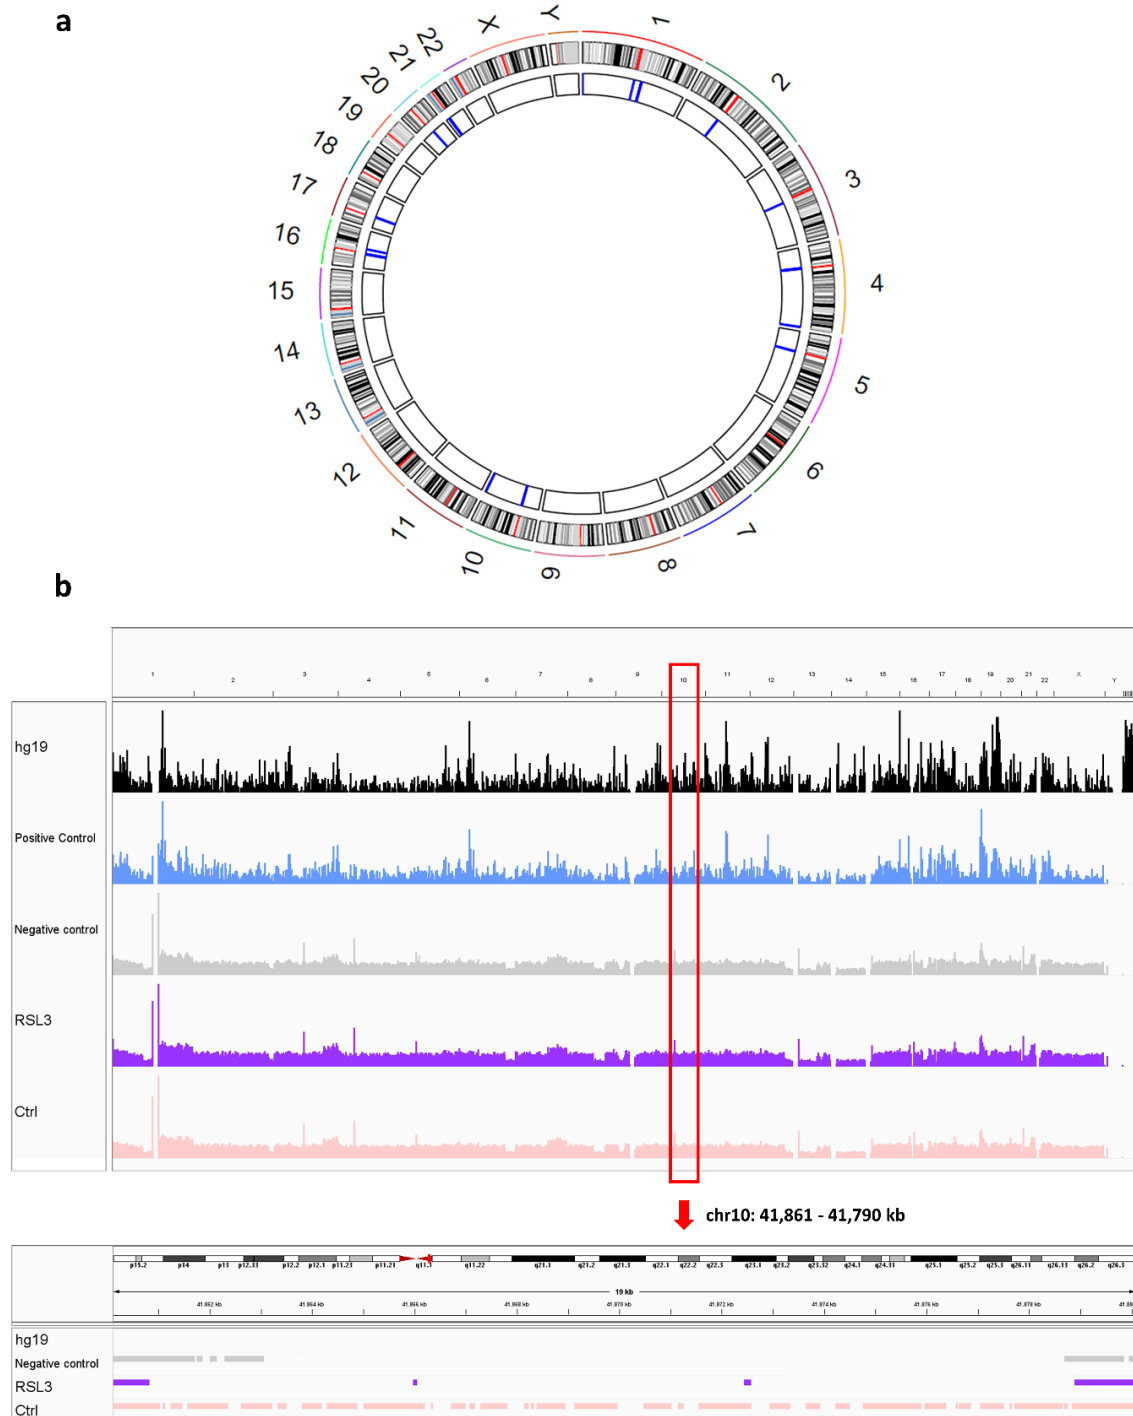

271

272 Figure 4: (a) Circos plot displaying chromosome ideograms (outer ring) with centromeric regions marked  
273 in red. Blue markings on the inner ring show the differentially enriched FOXA1-bound DNA regions in  
274 untreated control cells compared to RSL3-treated cells. (b) Overview of genomic regions sequenced in each  
275 CUT&RUN treatment condition (upper panel). The hg19 panel represents the reference genome and  
276 displays known mapped genes. The lower panel represents a close-up visualization of chr10: 41,861 –  
277 41,790 kb highlighting the loss of FOXA1 binding to perichromatin in RSL3-treated cells compared to  
278 controls. Figures were generated with Integrative Genomics Viewer (v2.9.4).  
279

## 280 Discussion

281 In the past decade, RCD and ferroptosis research has grown rapidly, especially in the field  
282 of neurological diseases and oncology [66]. Several morphological, biochemical, genetic,  
283 and protein hallmarks of ferroptotic cell death have been identified over the last years,  
284 but the exact executioner signals of ferroptosis remain largely unknown (reviewed in  
285 [29]). Identification of specific ferroptosis contributors may therefore provide novel  
286 opportunities for creating anti-cancer therapies. Consequently, we compared RNAseq  
287 data of ferroptotic MM and HEPG2 cells to explore whether common expression  
288 signatures could be found in these different experimental setups. Our analysis revealed  
289 that genes involved in metal binding, DNA binding, protein ubiquitination, and protein  
290 phosphorylation were shared in both ferroptosis models. Of particular interest, we  
291 identified ATP-independent chromatin remodeler FOXA1 to be specifically upregulated  
292 upon RSL3 and erastin treatment. FOXA1 levels were also found to be upregulated in  
293 liver tissue obtained from liver-specific GPX4 inducible knock-out mice, suggesting that  
294 increased FOXA1 mRNA and protein expression might be a universal trigger in various  
295 ferroptosis disease models. Further *in silico* motif and TF enrichment analysis predicted  
296 that Sp1 is the most likely driver of ferroptosis-driven FOXA1 expression. Sp1 has  
297 previously been described in context of lipid peroxidation and ferroptotic cell death, and  
298 is hypothesized to play a dual role in the regulation of tissue injury [7, 60, 61]. However,  
299 our qPCR data demonstrate that Sp1 expression remains unaltered in RSL3-treated MM1  
300 cells, implying that transcriptional activity of Sp1 is orchestrated through other upstream  
301 mechanisms. Post-translational modifications (PTMs), such as protein phosphorylation,  
302 are reported to directly influence Sp1 activity and might be altered in ferroptotic  
303 conditions [67]. Indeed, several upstream kinases responsible for Sp1 phosphorylation,  
304 including p38 and ATM/ATR are known to be involved in ferroptosis signaling as well  
305 [62, 68-70]. Alternatively, transcription activity of Sp1 may be stimulated through  
306 improved recruitment to its DNA target binding sites by cofactor proteins that are  
307 differentially expressed in the presence of ferroptotic stimuli. NR4A1, for example, has  
308 recently been identified as a modulator of ferroptotic cell death and is also reported to act  
309 as a cofactor of Sp1 [64, 65]. Follow-up proteomics, Western blot, and  
310 immunoprecipitation experiments will undoubtedly reveal to which extend PTMs and  
311 cofactor-recruitment of Sp1 are crucial for FOXA1 expression.

312 Two independent studies have recently reported that nuclear hormone receptor activity is  
313 highly correlated with ferroptosis sensitivity [71, 72]. Presumably, cells with higher

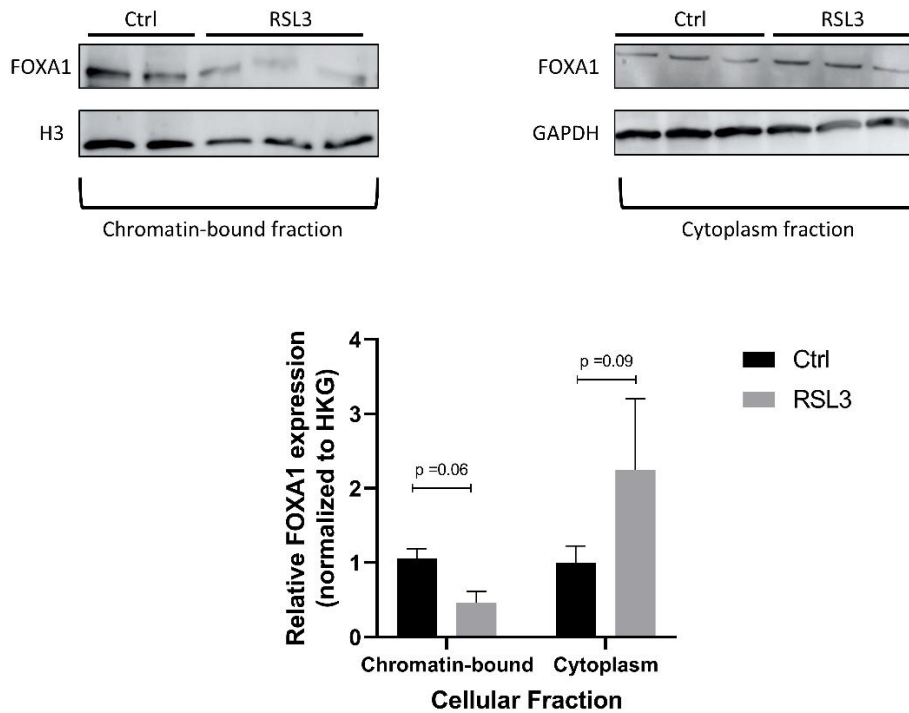

314  
315 *Figure 5: Relative FOXA1 protein expression of different cellular protein fractions in MM1R cells treated*  
316 *with 5  $\mu$ M RSL3 compared to untreated controls. Data are plotted as the mean  $\pm$  s.d.,  $n=3$  independent*  
317 *samples per treatment (indicated p-values are outcomes of unpaired, two-tailed t-test).*

318

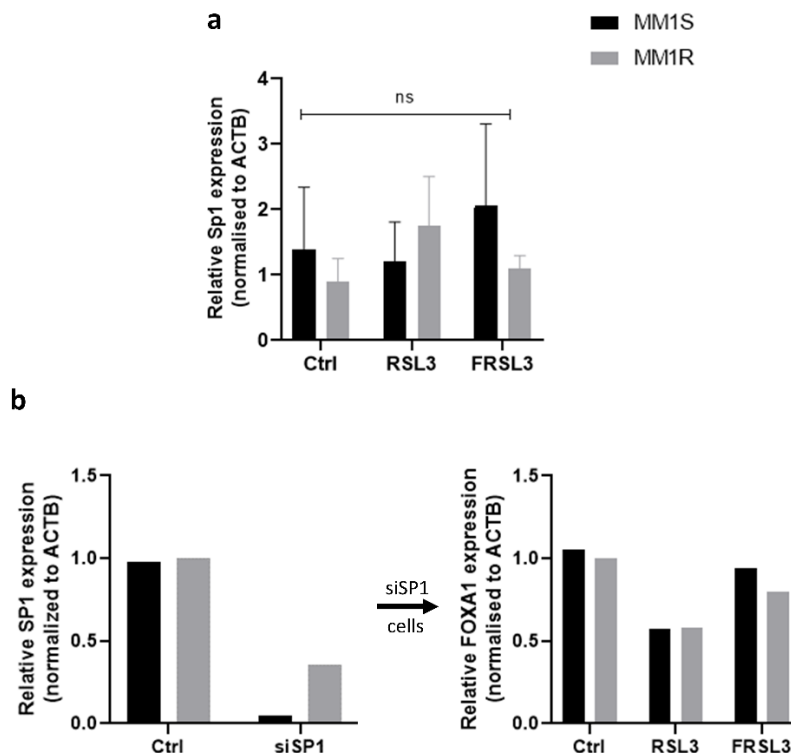

319  
320 *Figure 6: (a) Relative mRNA Sp1 expression in MM1 cells after 3 hr treatment with 5  $\mu$ M RSL3, with*  
321 *(FRSL3) or without pre-treatment with ferrostatin. Data are plotted as the mean  $\pm$  s.d.,  $n=3$  biologically*  
322 *independent samples per cell line (ns =  $p > 0.05$ , ANOVA). (b) Relative mRNA SP1 (left) and FOXA1*  
323 *expression in MM1 cells transfected with siRNA targeting SP1. Data are plotted as the mean  $\pm$  s.d.,*  
324  *$n=1$  biological independent sample per cell line*



325 endocrine activity are subjected to hormone-dependent ROS production, which promotes  
326 lipid peroxidation through activation of Fenton reactions [73]. Because FOXA1 is a  
327 critical interacting partner of several nuclear receptors [74], we wondered whether  
328 ferroptosis induction in MM1 cells is associated with an increase in hormone receptor  
329 activity. A preliminary screening of hormone receptor expression mRNA changes in  
330 RSL3-treated MM1 cells showed that the expression of the majority of nuclear receptors  
331 remain unchanged. Only a subset of orphan nuclear receptors, NR4A1-3, are specifically  
332 upregulated upon RSL3 induction. Although FOXA1 has been reported to regulate  
333 NR4A2 expression in immature midbrain dopaminergic neurons [45], the interplay  
334 between both proteins needs to be explored further. Possibly, NR4A receptors mediate  
335 ferroptotic cell death by influencing the cellular energy and lipid metabolism [64, 75]. On  
336 the other hand, these orphan receptors might orchestrate ferroptosis signaling pathways  
337 by recruiting other ferroptosis-dependent proteins to their target site, as previously  
338 explained. NR4A orphan receptors have also been associated with tumor suppressor  
339 functions, and mutations in NR4A1-3 have been linked with the formation of blood  
340 cancers, including leukemia and lymphoma [48, 49]. RSL3-driven upregulation of NR4A  
341 TFs might therefore drive elimination of MM cancer cells by regulating key cancer  
342 pathways (reviewed in [47]). Intriguingly, both ferroptosis and NR4A proteins are known  
343 to be regulated by the p53 tumor suppressor [76, 77] and indicates that an GPX4-NR4A-  
344 p53 signaling network may drive MM cell death. Further research about the anti-cancer  
345 effects of NR4A TFs in ferroptotic cells could potentially offer new therapeutical insights  
346 for MM and other hematological malignancies. Regardless, based on assessing  
347 expression changes, FOXA1 does not seem to primarily target (steroid) hormone  
348 receptors during ferroptosis. A direct measurement of hormone receptor activity, by  
349 evaluating nuclear translocation or by performing CHIP for example, might aid in fully  
350 characterizing the effects of FOXA1 in hormone signaling. Furthermore, evaluating  
351 FOXA1-dependent changes on nuclear receptors in more endocrine active cell systems,  
352 such as breast or pancreas cancer cell lines, might reveal cell type-dependent effects of  
353 FOXA1.

354 Because both FOXA1 and ferroptosis have been associated with EMT [40, 43, 52], we  
355 also investigated whether RSL3 treatment triggers significant changes in EMT markers.  
356 Generally, (tumor) cells harboring a more mesenchymal profile are considered to portray  
357 an increased ferroptosis sensitivity because they heavily rely on GPX4 activity compared  
358 to their epithelial counterparts [78]. Mesenchymal-state cells also exhibit more



359 dysregulated antioxidant programs, explaining why ferroptotic compounds are more  
360 potent in these cells [78, 79]. In this regard, ferroptosis-dependent reprogramming of the  
361 epithelial-mesenchymal state through FOXA1 upregulation, might promote ferroptosis  
362 sensitivity. While our RNAseq data revealed a correlation of FOXA1 expression with  
363 several other drivers of EMT, including TRIB1, N-CAD, E-CAD, SLUG, and TWIST1  
364 mRNA expression was not significantly altered upon RSL3 incubation. This suggests that  
365 MM1 cells do not shift toward a more epithelial – or mesenchymal-like state under  
366 ferroptotic conditions.

367 Given that neither hormone signaling or EMT seem to be direct downstream targets of  
368 FOXA1 in ferroptotic MM1 cells, genome-wide transcription site profiling was  
369 performed by CUT&RUN. Similar to ChIP-Seq, this technique combines ChIP with  
370 parallel DNA sequencing to identify binding sites of DNA-associated proteins, such as  
371 FOXA1. Unfortunately, signal-to-noise signals were quite low in our treatment setups,  
372 with signal intensities being similar to the negative IgG control. Further optimization of  
373 the experimental setup is therefore required before biologically relevant interpretations  
374 can be finalized. Increasing the starting amount of MM1 cells or addition of an extra  
375 cross-linking step might improve experimental outcome, especially since FOXA1 has  
376 been reported to transiently bind to its DNA sites [80]. Taking this into account, we could  
377 still identify 43 genome regions wherein FOXA1 binding was significantly altered in  
378 RSL3-treated MM1 cells compared to their untreated controls. Remarkably, all these  
379 regions were located in pericentromeric chromatin and FOXA1 binding was significantly  
380 lower in RSL3 conditions, despite the earlier observed transcriptional and translational  
381 FOXA1 upregulation in MM1 cells. Pericentric (satellite) DNA is typically considered to  
382 be void of functional genes and transcriptionally silent since they are confined in  
383 transcriptionally inert heterochromatin [81]. However, mounting evidence suggests that  
384 pericentric transcripts are crucial in maintaining genome stability (reviewed in [82] and  
385 [83]). To this end, loss of FOXA1 binding in ferroptotic cells could potentially promote  
386 genome instability and DNA double strand breakage. Another possibility is that  
387 ferroptotic stress triggers defective pericentric transcription due to dramatic DNA  
388 decondensation, as is also observed when cells are exposed to UV (i.e. DNA damage),  
389 cadmium toxicity or cellular senescence [56, 84-86]. Given that FOXA1, as a pioneer TF,  
390 mainly binds to heterochromatin regions, genome-wide DNA decondensation might  
391 promote overall loss of FOXA1 pericentromeric DNA binding and uncontrolled  
392 pericentric transcription. Our previous work (unpublished data) has indeed suggested that

393 ferroptosis is associated with an epigenomic stress response linked to oxidative stress and  
394 cellular senescence, suggesting that DNA decondensation might occur in ferroptotic cells.  
395 Intriguingly, FOXA1 expression has been reported to increase with cellular senescence  
396 [87]. Possibly, loss binding to heterochromatin pericentromeric DNA promotes  
397 recruitment of FOXA1 to other target sites that trigger cellular senescence [87]. Repeating  
398 the CUT&RUN experiments under optimized experimental conditions should help in  
399 investigating this hypothesis further. Alternatively, “DNA-free” FOXA1 might localize  
400 to the cytoplasm and inhibit nuclear translocation of other TFs to promote cell death [88].  
401 This seems to occur in our experimental setup as well, given that Western blot analysis  
402 revealed an RSL3-dependent increase in FOXA1 expression in cytoplasmic protein  
403 fractions.

404 Taken together, our data suggest that ferroptosis triggers a time-dependent upregulation  
405 of FOXA1 expression in different experimental models, which could be orchestrated by  
406 transcriptional activation of Sp1. The downstream effects of this FOXA1 expression  
407 surge in MM1 cells remain somewhat elusive but do not seem to include steroid hormone  
408 signaling or EMT. In contrast, preliminary data imply that ferroptotic stress might trigger  
409 uncontrolled pericentric transcription and genome instability, due to loss of FOXA1-  
410 binding to pericentromeric DNA. Moreover, relocalization of pericentric-free FOXA1 to  
411 secondary target sites or the cytoplasm might further promote cellular stress responses,  
412 such as cellular senescence or cell death.

413

## 414 **Materials and Methods**

### 415 *Cell Culture and Cell Viability Assays*

416 Human MM1S cells (CRL-2974) and MM1R cells (CRL-2975) were purchased from  
417 ATCC. RPMI-1640 medium, supplemented with 10% FBS (E.U Approved; South  
418 American Origin) and 1% Pen-Strep solution (Invitrogen, Carlsbad, CA, USA), was used  
419 to sustain the cells. The cells were cultivated at 37°C in 5% CO<sub>2</sub> and 95% air atmosphere  
420 and 95-98% humidity. To assess cell viability, the colorimetric assay with 3-(4, 5-  
421 dimethylthiazol-2-yl)-2, 5-diphenyltetrazolium bromide (MTT) was used (Sigma  
422 Aldrich, St. Louis, MO, US) as previously described [89].

### 423 *Antibodies and Reagents*

424 RSL3 was purchased from Selleckchem (Houston, USA), dissolved in DMSO and stored  
425 as 50 mM stocks at -20°C. siRNA targeting Sp1 (1299001) was purchased from

426 ThermoFisher Scientific (Waltham, MA, USA)).  
427 Antibodies FOXA1 (ab23738) and GAPDH (2118S) were obtained from Abcam  
428 (Cambridge, UK) and Cell Signaling Technology (Danvers, MA, USA), respectively.

#### 429 ***RNA Extraction and Sequencing***

430 After cell harvest, total RNA from untreated or RSL3-treated (with or without 2 hr pre-  
431 treatment with 2  $\mu$ M Ferrostatin-1) MM1S and MM1R cells was extracted using the  
432 RNeasy Mini Kit (Qiagen, Venlo, the Netherlands) according to the manufacturer's  
433 protocol. Once isolated, quantification was performed with the Qubit RNA BR Assay Kit  
434 (ThermoFisher, MA, USA) and RNA was stored at  $-80^{\circ}\text{C}$ . Extracted RNA was used as  
435 input for RNA sequencing as previously described [90]. In brief, RNA was shipped to  
436 BGI (BGI Group, Beijing, China) where quality checks were performed using the  
437 2100 Bioanalyzer system (Agilent Technologies, USA) and sequencing took place using  
438 the BGISE-500 platform (BGI Group, Beijing, China). Quality control, genome mapping  
439 and differential gene expression analysis was performed using the R-  
440 packages FastQC (v0.11.5) [91], STAR (v2.7.3a) [92], and DESeq2 (v3.12) [93]. DEGs  
441 were considered to be significant when  $\text{FDR} < 0.05$  and  $|\log_2\text{FC}| > 1$ . Raw gene counts  
442 from the GSE104462 dataset [94] were extracted from the Gene Expression Omnibus  
443 (GEO) database and used as input for the same RNAseq analysis pipeline as described  
444 above.

#### 445 ***cDNA Synthesis and Quantitative Real-time PCR***

446 Extracted RNA from RSL3-treated cells was converted into cDNA using the Go-  
447 Script reverse transcription system (Promega, Madison, Wisconsin, USA) according to  
448 the manufacturer's protocol. Subsequently, qPCR analysis was carried out using  
449 the GoTag qPCR Master Mix (Promega, Madison, Wisconsin, USA) as explained  
450 by manufacturer's protocol. In short, 1  $\mu$ L cDNA was added to a master mix comprising  
451 SYBR green, nuclease-free water, and 0.4  $\mu$ M forward and reverse primers. The  
452 following PCR program was applied on the Rotor-Gene Q qPCR machine (Qiagen,  
453 Venlo, the Netherlands):  $95^{\circ}\text{C}$  for 2 min, 40 cycles denaturation ( $95^{\circ}\text{C}$ , 15 s) and  
454 annealing/extension ( $60^{\circ}\text{C}$ , 30 s), and dissociation ( $60$ – $95^{\circ}\text{C}$ ). Each sample was run in  
455 triplicate and the median value was used to determine the  $\Delta\Delta\text{Ct}$ -values using  $\beta$ -actin  
456 (BACT) as the normalization gene. Primer sequences are listed in Supplementary Table  
457 S1.

#### 458 ***Protein Extraction and Western blot Analysis***

459 Cellular protein extraction occurred by resuspending cell pellets in 0.5 mL RIPA buffer  
460 (150 mM NaCl, 0.1% Triton X-100, 1% SDS, 50 mM Tris-HCl pH 8) supplemented  
461 with PhosphataseArrest (G-Biosciences, Saint-Louis, MO, USA) and protease inhibitors  
462 (Complete Mini®, Roche). After 15 min incubation on ice with regular vortexing,  
463 samples were briefly sonicated (1 min, amplitude 30 kHz, pulse 1s) and centrifuged at  
464 13 200 rpm for 20 min at 4°C. Solubilized proteins were transferred to new Eppendorf  
465 tubes and stored at -20 °C. To extract proteins from mouse liver tissue, RIPA buffer  
466 containing 2% SDS was added to the tissue. Sample homogenisation was performed  
467 with the TissueRuptor, followed by 1 hour incubation at 4°C on a rotor. Sonication (5  
468 min, low amplitude 1 kHz and 20 Hz burst rate) was used to shear DNA and debris was  
469 removed by centrifugation for 8 min at 13 000 g.

470 Using standard protocols, all protein samples were separated using Bis-Tris SDS-  
471 PAGE with a high-MW MOPS running buffer, and transferred onto nitrocellulose  
472 membranes (Hybond C, Amersham) using the Power Blotter System (ThermoFisher, MA,  
473 USA). Blocking the membranes for 1 hour with blocking buffer (20 mM Tris-HCl, 140  
474 mM NaCl, 5% BSA, pH 7,5) at RT was followed by overnight incubation with the  
475 primary antibody at 4°C. Blots were then incubated for 1 hr with the secondary, HRP  
476 dye-conjugated antibody (Dako, Glostrup, Denmark) after which  
477 chemiluminescent signals were detected with the Amersham Imager 680 (Cytiva, MA,  
478 USA) and quantified with the ImageJ software (v1.53j) [95].

#### 479 ***Liver Samples of Cre-lox Liver-Specific GPX4 Knockout Mice***

480 Liver samples from Cre-lox liver-specific inducible GPX4 knockout mice were kindly  
481 provided by Ines Goetschalckx and Prof. Dr. Tom Vanden Berghe (Laboratory of  
482 Pathophysiology, University of Antwerp). GPX4 knockout mice were generated by  
483 crossing homozygous GPX4-floxed mice with heterozygous GPX4 conditional knockout  
484 mice (Supplementary Figure S1).

#### 485 ***Nucleofection of MM cells***

486 MM1 cells were transfected using the Nucleofector Iib device (Lonza Amaxa,  
487 Switzerland) as described by the manufacturer's protocol. Briefly, 1 million cells were  
488 resuspended in 100 µL supplemented nucleofector solution. Next, 300 nM siSp1 was  
489 added to resuspended cells. To assess transfection efficiency, an additional pmaxGFP  
490 Vector (Lonza, Bazel, Switzerland) was included in each nucleofection reaction (average

491 transfection efficiency =  $51.3 \pm 2.4$  %). Cell suspensions were transferred to a provided  
492 cuvettes and nucleofection was performed using the O-020 program. 48 hours after  
493 transfection, cells were harvested and used as input for qPCR analysis.

#### 494 ***Motif Analysis and Transcription Factor Enrichment Analysis***

495 To search for a potential driver of FOXA1, a list of candidate drivers was composed using  
496 transcription factor binding sites from the SwissRegulon database located at  
497 the *FOXA1* promoter [58, 96]. Using that list, a list of targets of these candidate drivers  
498 was composed using data from three different databases – IFTP, TRRUST and  
499 Marbach2016 – provided via the tftargets package in R [59]. Targets of each candidate  
500 driver were matched to DEGs common to both datasets and two metrics for overlap were  
501 calculated: the number of overlapping genes and the percentage of overlap with respect  
502 to the number of DEGs. As an additional control, the X2Kweb tool was further used  
503 to identify putative enriched transcription factors through Transcription factor enrichment  
504 analysis (TFEA) [97]. Results from TFEA were compared with results from IFTP,  
505 TRRUST and Marbach2016.

#### 506 ***CUTANA Cut&Run to Identify Chromatin-Associated Proteins***

507 Downstream targets of FOXA1 were identified using the EpiCypher CUTANA ChIC  
508 CUT&RUN Kit (23614-1048, EpiCypher, USA) as previously described [53, 98]. In  
509 short,  $5 \times 10^5$  MM1R were plated into 6-well plates and either treated with  $5 \mu\text{M}$  RSL3  
510 (3 hours) or left untreated. For each treatment condition, 4 biological replicates were  
511 included. Cells were washed and bound to concanavalin A-coated magnetic beads and  
512 permeabilized with wash buffer (20 mM HEPES pH 7.5, 150 mM NaCl, 0,5 mM  
513 spermidine and protease inhibitors) supplemented with 0,05% digitonin. After overnight  
514 incubation at  $4^\circ\text{C}$  with the primary FOXA1 antibody (13-2001, EpiCypher), cell-bead  
515 slurry was washed twice more after which pA-MNase digestion was activated by placing  
516 samples on an ice-cold block and incubated with digitonin wash buffer containing 2 mM  
517  $\text{CaCl}_2$ . Each CUT&RUN experiment also featured a positive (anti-H3K4me3) and  
518 negative (anti-Rabbit IgG) antibody control. After 2 hours, the cleavage reaction was  
519 stopped with stop buffer (340 mM NaCl, 20 mM EDTA, 4 mM EGTA, 0.05% digitonin,  
520 0.05 mg/mL glycogen,  $5 \mu\text{g/mL}$  RNase A,  $2 \text{ pg/mL}$  *E. coli* spike-in DNA) and fragments  
521 were released by 30-minute incubation at  $37^\circ\text{C}$ . Samples were centrifuged and DNA-  
522 containing supernatant was collected. DNA extraction was performed with a DNA  
523 extraction kit supplied with the CUTANA Kit. Resulting DNA was used as input for

524 library preparation using Kapa HypePrep Kit (7962363001, Roche) and barcoding using  
525 xGen UDI-UMI barcodes (10005903, IDT) following manufacturers protocols.  
526 Barcoded libraries of ten samples (4 treated, 4 untreated and two controls) were  
527 equimolarly pooled and sequenced on MiSeq (Illumina) using MiSeq v3 150 reagent kit  
528 (MS-102-3001, Illumina) according to manufacturer's protocol. The run ended in  
529 obtaining 4.16 Gb, 56.66 million reads (Q30 92.09%, 3,86 Gb).  
530 Sequencing data were aligned to the UCSC h38 reference genome using the Burrows-  
531 Wheeler Aligner [99] and peaks were called using SEARC [54] after conversion to the  
532 bedgraph format using bedtools [100]. Peaks were merged using Granges [101]. For each  
533 peak region, the number of mapping reads was counted using chromVAR [102]  
534 getCounts. *E.coli* spike-in counts were obtained by alignment to the eschColi\_K12 *E.coli*  
535 reference. Differential analysis was performed using the DESeq2 package (v3.12) [93],  
536 where counts were normalized to *E.coli* spike-in counts. Differentially enriched regions  
537 were visualized with the RCircos R package (v1.2.1) [103] and IGV (v2.9.4)  
538 (BroadInstitute, Cambridge, MA, USA).

### 539 ***Subcellular Protein Fractionation***

540 The subcellular protein fractionation kit (# 78840, Thermofisher, MA, USA) was used to  
541 fractionate proteins into nuclear and cytoplasmic fractions according to the  
542 manufacturer's instructions. The yield of obtained chromatin-bound nuclear proteins and  
543 cytoplasmic proteins was determined by the BCA method. Finally, 20 µg of protein from  
544 each cellular fraction was used to perform SDS-PAGE and Western blot analysis, as  
545 described above.

### 546 ***Statistical Analysis***

547 Statistical tests were performed in GraphPad Prism (v7.0) (GraphPad Software, San  
548 Diego, CA, USA) unless otherwise stated in the main text. Results were considered to be  
549 statistically significant when p-values < 0.05 were obtained.

550



551 **References**

- 552 1. Dixon SJ, Lemberg KM, Lamprecht MR, Skouta R, Zaitsev EM, Gleason CE, Patel DN, Bauer  
553 AJ, Cantley AM, Yang WS, et al. Ferroptosis: an iron-dependent form of nonapoptotic cell death.  
554 Cell. 2012;149(5):1060-72.
- 555 2. Stockwell BR, Friedmann Angeli JP, Bayir H, Bush AI, Conrad M, Dixon SJ, Fulda S, Gascon  
556 S, Hatzios SK, Kagan VE, et al. Ferroptosis: A Regulated Cell Death Nexus Linking Metabolism,  
557 Redox Biology, and Disease. Cell. 2017;171(2):273-85.
- 558 3. Yan B, Ai Y, Sun Q, Ma Y, Cao Y, Wang J, Zhang Z, Wang X. Membrane Damage during  
559 Ferroptosis Is Caused by Oxidation of Phospholipids Catalyzed by the Oxidoreductases POR and  
560 CYB5R1. Mol Cell. 2021;81(2):355-69 e10.
- 561 4. Kupersmidt L, Amit T, Bar-Am O, Weinreb O, Youdim MB. Multi-target, neuroprotective and  
562 neurorestorative M30 improves cognitive impairment and reduces Alzheimer's-like  
563 neuropathology and age-related alterations in mice. Mol Neurobiol. 2012;46(1):217-20.
- 564 5. Yan N, Zhang J. Iron Metabolism, Ferroptosis, and the Links With Alzheimer's Disease. Front  
565 Neurosci. 2019;13:1443.
- 566 6. Fang X, Wang H, Han D, Xie E, Yang X, Wei J, Gu S, Gao F, Zhu N, Yin X, et al. Ferroptosis  
567 as a target for protection against cardiomyopathy. Proc Natl Acad Sci U S A. 2019;116(7):2672-  
568 80.
- 569 7. Li Y, Feng D, Wang Z, Zhao Y, Sun R, Tian D, Liu D, Zhang F, Ning S, Yao J, et al. Ischemia-  
570 induced ACSL4 activation contributes to ferroptosis-mediated tissue injury in intestinal  
571 ischemia/reperfusion. Cell Death Differ. 2019;26(11):2284-99.
- 572 8. Li S, Zheng L, Zhang J, Liu X, Wu Z. Inhibition of ferroptosis by up-regulating Nrf2 delayed the  
573 progression of diabetic nephropathy. Free Radic Biol Med. 2021;162:435-49.
- 574 9. Han C, Liu Y, Dai R, Ismail N, Su W, Li B. Ferroptosis and Its Potential Role in Human Diseases.  
575 Front Pharmacol. 2020;11:239.
- 576 10. Fernald K, Kurokawa M. Evading apoptosis in cancer. Trends Cell Biol. 2013;23(12):620-33.
- 577 11. Hassannia B, Vandenabeele P, Vanden Berghe T. Targeting Ferroptosis to Iron Out Cancer.  
578 Cancer Cell. 2019;35(6):830-49.
- 579 12. Torti SV, Torti FM. Iron and Cancer: 2020 Vision. Cancer Res. 2020;80(24):5435-48.
- 580 13. Trachootham D, Alexandre J, Huang P. Targeting cancer cells by ROS-mediated mechanisms: a  
581 radical therapeutic approach? Nat Rev Drug Discov. 2009;8(7):579-91.
- 582 14. VanderWall K, Daniels-Wells TR, Penichet M, Lichtenstein A. Iron in multiple myeloma. Crit  
583 Rev Oncog. 2013;18(5):449-61.
- 584 15. Steegmann-Olmedillas JL. The role of iron in tumour cell proliferation. Clin Transl Oncol.  
585 2011;13(2):71-6.
- 586 16. Wang F, Lv H, Zhao B, Zhou L, Wang S, Luo J, Liu J, Shang P. Iron and leukemia: new insights  
587 for future treatments. J Exp Clin Cancer Res. 2019;38(1):406.



- 588 17. Yang WS, SriRamaratnam R, Welsch ME, Shimada K, Skouta R, Viswanathan VS, Cheah JH,  
589 Clemons PA, Shamji AF, Clish CB, et al. Regulation of ferroptotic cancer cell death by GPX4.  
590 Cell. 2014;156(1-2):317-31.
- 591 18. Bordini J, Morisi F, Cerruti F, Cascio P, Camaschella C, Ghia P, Campanella A. Iron Causes  
592 Lipid Oxidation and Inhibits Proteasome Function in Multiple Myeloma Cells: A Proof of  
593 Concept for Novel Combination Therapies. Cancers (Basel). 2020;12(4).
- 594 19. Zhong Y, Tian F, Ma H, Wang H, Yang W, Liu Z, Liao A. FTY720 induces ferroptosis and  
595 autophagy via PP2A/AMPK pathway in multiple myeloma cells. Life Sci. 2020;260:118077.
- 596 20. Kinowaki Y, Kurata M, Ishibashi S, Ikeda M, Tatsuzawa A, Yamamoto M, Miura O, Kitagawa  
597 M, Yamamoto K. Glutathione peroxidase 4 overexpression inhibits ROS-induced cell death in  
598 diffuse large B-cell lymphoma. Lab Invest. 2018;98(5):609-19.
- 599 21. Abdalkader M, Lampinen R, Kanninen KM, Malm TM, Liddell JR. Targeting Nrf2 to Suppress  
600 Ferroptosis and Mitochondrial Dysfunction in Neurodegeneration. Front Neurosci. 2018;12:466.
- 601 22. Dixon SJ, Patel DN, Welsch M, Skouta R, Lee ED, Hayano M, Thomas AG, Gleason CE,  
602 Tatonetti NP, Slusher BS, et al. Pharmacological inhibition of cystine-glutamate exchange  
603 induces endoplasmic reticulum stress and ferroptosis. Elife. 2014;3:e02523.
- 604 23. Feng H, Schorpp K, Jin J, Yozwiak CE, Hoffstrom BG, Decker AM, Rajbhandari P, Stokes ME,  
605 Bender HG, Csuka JM, et al. Transferrin Receptor Is a Specific Ferroptosis Marker. Cell Reports.  
606 2020;30(10):3411-23.e7.
- 607 24. Park E, Chung SW. ROS-mediated autophagy increases intracellular iron levels and ferroptosis  
608 by ferritin and transferrin receptor regulation. Cell Death Dis. 2019;10(11):822.
- 609 25. Yuan H, Li X, Zhang X, Kang R, Tang D. Identification of ACSL4 as a biomarker and contributor  
610 of ferroptosis. Biochem Biophys Res Commun. 2016;478(3):1338-43.
- 611 26. Tang D, Chen X, Kang R, Kroemer G. Ferroptosis: molecular mechanisms and health  
612 implications. Cell Res. 2021;31(2):107-25.
- 613 27. Doll S, Proneth B, Tyurina YY, Panzilius E, Kobayashi S, Ingold I, Irmeler M, Beckers J, Aichler  
614 M, Walch A, et al. ACSL4 dictates ferroptosis sensitivity by shaping cellular lipid composition.  
615 Nat Chem Biol. 2017;13(1):91-8.
- 616 28. Chu B, Kon N, Chen D, Li T, Liu T, Jiang L, Song S, Tavana O, Gu W. ALOX12 is required for  
617 p53-mediated tumour suppression through a distinct ferroptosis pathway. Nat Cell Biol.  
618 2019;21(5):579-91.
- 619 29. Chen X, Comish PB, Tang D, Kang R. Characteristics and Biomarkers of Ferroptosis. Front Cell  
620 Dev Biol. 2021;9:637162.
- 621 30. Brown CW, Amante JJ, Chhoy P, Elaimy AL, Liu H, Zhu LJ, Baer CE, Dixon SJ, Mercurio AM.  
622 Prominin2 Drives Ferroptosis Resistance by Stimulating Iron Export. Dev Cell. 2019;51(5):575-  
623 86 e4.

- 624 31. Doll S, Freitas FP, Shah R, Aldrovandi M, da Silva MC, Ingold I, Goya Grocin A, Xavier da  
625 Silva TN, Panzilius E, Scheel CH, et al. FSP1 is a glutathione-independent ferroptosis suppressor.  
626 Nature. 2019;575(7784):693-8.
- 627 32. Brown CW, Amante JJ, Goel HL, Mercurio AM. The alpha6beta4 integrin promotes resistance  
628 to ferroptosis. J Cell Biol. 2017;216(12):4287-97.
- 629 33. Sun X, Niu X, Chen R, He W, Chen D, Kang R, Tang D. Metallothionein-1G facilitates sorafenib  
630 resistance through inhibition of ferroptosis. Hepatology. 2016;64(2):488-500.
- 631 34. Zaret KS, Carroll JS. Pioneer transcription factors: establishing competence for gene expression.  
632 Genes Dev. 2011;25(21):2227-41.
- 633 35. Cirillo LA, Lin FR, Cuesta I, Friedman D, Jarnik M, Zaret KS. Opening of compacted chromatin  
634 by early developmental transcription factors HNF3 (FoxA) and GATA-4. Mol Cell.  
635 2002;9(2):279-89.
- 636 36. Nakshatri H, Badve S. FOXA1 as a therapeutic target for breast cancer. Expert opinion on  
637 therapeutic targets. 2007;11(4):507-14.
- 638 37. Gao N, Zhang J, Rao MA, Case TC, Mirosevich J, Wang Y, Jin R, Gupta A, Rennie PS, Matusik  
639 RJ. The role of hepatocyte nuclear factor-3 alpha (Forkhead Box A1) and androgen receptor in  
640 transcriptional regulation of prostatic genes. Mol Endocrinol. 2003;17(8):1484-507.
- 641 38. Moya M, Benet M, Guzman C, Tolosa L, Garcia-Monzon C, Pareja E, Castell JV, Jover R. Foxa1  
642 reduces lipid accumulation in human hepatocytes and is down-regulated in nonalcoholic fatty  
643 liver. PLoS One. 2012;7(1):e30014.
- 644 39. Slebe F, Rojo F, Vinaixa M, Garcia-Rocha M, Testoni G, Guiu M, Planet E, Samino S, Arenas  
645 EJ, Beltran A, et al. FoxA and LIPG endothelial lipase control the uptake of extracellular lipids  
646 for breast cancer growth. Nat Commun. 2016;7:11199.
- 647 40. BenAyed-Guerfali D, Dabbeche-Bouricha E, Ayadi W, Trifa F, Charfi S, Khabir A, Sellami-  
648 Boudawara T, Mokdad-Gargouri R. Association of FOXA1 and EMT markers (Twist1 and E-  
649 cadherin) in breast cancer. Mol Biol Rep. 2019;46(3):3247-55.
- 650 41. Anzai E, Hirata K, Shibazaki M, Yamada C, Morii M, Honda T, Yamaguchi N, Yamaguchi N.  
651 FOXA1 Induces E-Cadherin Expression at the Protein Level via Suppression of Slug in Epithelial  
652 Breast Cancer Cells. Biol Pharm Bull. 2017;40(9):1483-9.
- 653 42. Zhang Y, Zhang D, Li Q, Liang J, Sun L, Yi X, Chen Z, Yan R, Xie G, Li W, et al. Nucleation  
654 of DNA repair factors by FOXA1 links DNA demethylation to transcriptional pioneering. Nat  
655 Genet. 2016;48(9):1003-13.
- 656 43. Lee J, You JH, Kim MS, Roh JL. Epigenetic reprogramming of epithelial-mesenchymal  
657 transition promotes ferroptosis of head and neck cancer. Redox Biol. 2020;37:101697.
- 658 44. Chen PH, Tseng WH, Chi JT. The Intersection of DNA Damage Response and Ferroptosis-A  
659 Rationale for Combination Therapeutics. Biology (Basel). 2020;9(8).

- 660 45. Ferri AL, Lin W, Mavromatakis YE, Wang JC, Sasaki H, Whitsett JA, Ang SL. Foxa1 and Foxa2  
661 regulate multiple phases of midbrain dopaminergic neuron development in a dosage-dependent  
662 manner. *Development*. 2007;134(15):2761-9.
- 663 46. Pristera A, Lin W, Kaufmann AK, Brimblecombe KR, Threlfell S, Dodson PD, Magill PJ,  
664 Fernandes C, Cragg SJ, Ang SL. Transcription factors FOXA1 and FOXA2 maintain  
665 dopaminergic neuronal properties and control feeding behavior in adult mice. *Proc Natl Acad Sci*  
666 *U S A*. 2015;112(35):E4929-38.
- 667 47. Beard JA, Tenga A, Chen T. The interplay of NR4A receptors and the oncogene-tumor  
668 suppressor networks in cancer. *Cell Signal*. 2015;27(2):257-66.
- 669 48. Mullican SE, Zhang S, Konopleva M, Ruvolo V, Andreeff M, Milbrandt J, Conneely OM.  
670 Abrogation of nuclear receptors Nr4a3 and Nr4a1 leads to development of acute myeloid  
671 leukemia. *Nat Med*. 2007;13(6):730-5.
- 672 49. Ramirez-Herrick AM, Mullican SE, Sheehan AM, Conneely OM. Reduced NR4A gene dosage  
673 leads to mixed myelodysplastic/myeloproliferative neoplasms in mice. *Blood*.  
674 2011;117(9):2681-90.
- 675 50. Sekiya T, Kashiwagi I, Yoshida R, Fukaya T, Morita R, Kimura A, Ichinose H, Metzger D,  
676 Chambon P, Yoshimura A. Nr4a receptors are essential for thymic regulatory T cell development  
677 and immune homeostasis. *Nat Immunol*. 2013;14(3):230-7.
- 678 51. Odagiu L, Boulet S, Maurice De Sousa D, Daudelin JF, Nicolas S, Labrecque N. Early  
679 programming of CD8(+) T cell response by the orphan nuclear receptor NR4A3. *Proc Natl Acad*  
680 *Sci U S A*. 2020;117(39):24392-402.
- 681 52. Wang H, Meyer CA, Fei T, Wang G, Zhang F, Liu XS. A systematic approach identifies FOXA1  
682 as a key factor in the loss of epithelial traits during the epithelial-to-mesenchymal transition in  
683 lung cancer. *BMC Genomics*. 2013;14:680.
- 684 53. Skene PJ, Henikoff S. An efficient targeted nuclease strategy for high-resolution mapping of  
685 DNA binding sites. *Elife*. 2017;6.
- 686 54. Meers MP, Tenenbaum D, Henikoff S. Peak calling by Sparse Enrichment Analysis for  
687 CUT&RUN chromatin profiling. *Epigenetics Chromatin*. 2019;12(1):42.
- 688 55. De Cecco M, Criscione SW, Peckham EJ, Hillenmeyer S, Hamm EA, Manivannan J, Peterson  
689 AL, Kreiling JA, Neretti N, Sedivy JM. Genomes of replicatively senescent cells undergo global  
690 epigenetic changes leading to gene silencing and activation of transposable elements. *Aging Cell*.  
691 2013;12(2):247-56.
- 692 56. Tasselli L, Xi Y, Zheng W, Tennen RI, Odrowaz Z, Simeoni F, Li W, Chua KF. SIRT6  
693 deacetylates H3K18ac at pericentric chromatin to prevent mitotic errors and cellular senescence.  
694 *Nat Struct Mol Biol*. 2016;23(5):434-40.
- 695 57. Zhou Y, Zhou B, Pache L, Chang M, Khodabakhshi AH, Tanaseichuk O, Benner C, Chanda SK.  
696 Metascape provides a biologist-oriented resource for the analysis of systems-level datasets. *Nat*  
697 *Commun*. 2019;10(1):1523.

- 698 58. Pachkov M, Balwierz PJ, Arnold P, Ozonov E, van Nimwegen E. SwissRegulon, a database of  
699 genome-wide annotations of regulatory sites: recent updates. *Nucleic Acids Res.*  
700 2013;41(Database issue):D214-20.
- 701 59. Human transcription factor target genes. <https://github.com/slowkow/tftargets>. Date accessed:  
702 18th May 2021
- 703 60. Alim I, Caulfield JT, Chen Y, Swarup V, Geschwind DH, Ivanova E, Seravalli J, Ai Y, Sansing  
704 LH, Ste Marie EJ, et al. Selenium Drives a Transcriptional Adaptive Program to Block  
705 Ferroptosis and Treat Stroke. *Cell.* 2019;177(5):1262-79 e25.
- 706 61. Ayala A, Munoz MF, Arguelles S. Lipid peroxidation: production, metabolism, and signaling  
707 mechanisms of malondialdehyde and 4-hydroxy-2-nonenal. *Oxidative medicine and cellular*  
708 *longevity.* 2014;2014:360438.
- 709 62. Chen PH, Wu J, Ding CC, Lin CC, Pan S, Bossa N, Xu Y, Yang WH, Mathey-Prevot B, Chi JT.  
710 Kinome screen of ferroptosis reveals a novel role of ATM in regulating iron metabolism. *Cell*  
711 *Death Differ.* 2020;27(3):1008-22.
- 712 63. Tan NY, Khachigian LM. Sp1 phosphorylation and its regulation of gene transcription. *Mol Cell*  
713 *Biol.* 2009;29(10):2483-8.
- 714 64. Ye Z, Zhuo Q, Hu Q, Xu X, Mengqi L, Zhang Z, Xu W, Liu W, Fan G, Qin Y, et al. FBW7-  
715 NRA41-SCD1 axis synchronously regulates apoptosis and ferroptosis in pancreatic cancer cells.  
716 *Redox Biol.* 2021;38:101807.
- 717 65. Safe S, Shrestha R, Mohankumar K. Orphan nuclear receptor 4A1 (NR4A1) and novel ligands.  
718 *Essays Biochem.* 2021.
- 719 66. Wu H, Wang Y, Tong L, Yan H, Sun Z. Global Research Trends of Ferroptosis: A Rapidly  
720 Evolving Field With Enormous Potential. *Front Cell Dev Biol.* 2021;9:646311.
- 721 67. Chu S. Transcriptional regulation by post-transcriptional modification--role of phosphorylation  
722 in Sp1 transcriptional activity. *Gene.* 2012;508(1):1-8.
- 723 68. Hattori K, Ishikawa H, Sakauchi C, Takayanagi S, Naguro I, Ichijo H. Cold stress-induced  
724 ferroptosis involves the ASK1-p38 pathway. *EMBO Rep.* 2017;18(11):2067-78.
- 725 69. Li L, Hao Y, Zhao Y, Wang H, Zhao X, Jiang Y, Gao F. Ferroptosis is associated with oxygen-  
726 glucose deprivation/reoxygenation-induced Sertoli cell death. *Int J Mol Med.* 2018;41(5):3051-  
727 62.
- 728 70. Yu Y, Xie Y, Cao L, Yang L, Yang M, Lotze MT, Zeh HJ, Kang R, Tang D. The ferroptosis  
729 inducer erastin enhances sensitivity of acute myeloid leukemia cells to chemotherapeutic agents.  
730 *Mol Cell Oncol.* 2015;2(4):e1054549.
- 731 71. Kwon OS, Kwon EJ, Kong HJ, Choi JY, Kim YJ, Lee EW, Kim W, Lee H, Cha HJ. Systematic  
732 identification of a nuclear receptor-enriched predictive signature for erastin-induced ferroptosis.  
733 *Redox Biol.* 2020;37:101719.

- 734 72. Weigand I, Schreiner J, Rohrig F, Sun N, Landwehr LS, Urlaub H, Kendl S, Kiseljak-Vassiliades  
735 K, Wierman ME, Angeli JPF, et al. Active steroid hormone synthesis renders adrenocortical cells  
736 highly susceptible to type II ferroptosis induction. *Cell Death Dis.* 2020;11(3):192.
- 737 73. Belavgeni A, Bornstein SR, Linkermann A. Stress will kill you anyway! *Cell Death Dis.*  
738 2020;11(4):218.
- 739 74. Augello MA, Hickey TE, Knudsen KE. FOXA1: master of steroid receptor function in cancer.  
740 *EMBO J.* 2011;30(19):3885-94.
- 741 75. Hertz R, Magenheimer J, Berman I, Bar-Tana J. Fatty acyl-CoA thioesters are ligands of hepatic  
742 nuclear factor-4alpha. *Nature.* 1998;392(6675):512-6.
- 743 76. Kang R, Kroemer G, Tang D. The tumor suppressor protein p53 and the ferroptosis network.  
744 *Free Radic Biol Med.* 2019;133:162-8.
- 745 77. Fedorova O, Petukhov A, Daks A, Shuvalov O, Leonova T, Vasileva E, Aksenov N, Melino G,  
746 Barlev NA. Orphan receptor NR4A3 is a novel target of p53 that contributes to apoptosis.  
747 *Oncogene.* 2019;38(12):2108-22.
- 748 78. Viswanathan VS, Ryan MJ, Dhruv HD, Gill S, Eichhoff OM, Seashore-Ludlow B, Kaffenberger  
749 SD, Eaton JK, Shimada K, Aguirre AJ, et al. Dependency of a therapy-resistant state of cancer  
750 cells on a lipid peroxidase pathway. *Nature.* 2017;547(7664):453-7.
- 751 79. Hangauer MJ, Viswanathan VS, Ryan MJ, Bole D, Eaton JK, Matov A, Galeas J, Dhruv HD,  
752 Berens ME, Schreiber SL, et al. Drug-tolerant persister cancer cells are vulnerable to GPX4  
753 inhibition. *Nature.* 2017;551(7679):247-50.
- 754 80. Metzakopian E, Bouhali K, Alvarez-Saavedra M, Whitsett JA, Picketts DJ, Ang SL. Genome-  
755 wide characterisation of Foxa1 binding sites reveals several mechanisms for regulating neuronal  
756 differentiation in midbrain dopamine cells. *Development.* 2015;142(7):1315-24.
- 757 81. Smurova K, De Wulf P. Centromere and Pericentromere Transcription: Roles and Regulation ...  
758 in Sickness and in Health. *Front Genet.* 2018;9:674.
- 759 82. Eymery A, Callanan M, Vourc'h C. The secret message of heterochromatin: new insights into the  
760 mechanisms and function of centromeric and pericentric repeat sequence transcription. *Int J Dev*  
761 *Biol.* 2009;53(2-3):259-68.
- 762 83. Hall LE, Mitchell SE, O'Neill RJ. Pericentric and centromeric transcription: a perfect balance  
763 required. *Chromosome Res.* 2012;20(5):535-46.
- 764 84. Jolly C, Metz A, Govin J, Vigneron M, Turner BM, Khochbin S, Vourc'h C. Stress-induced  
765 transcription of satellite III repeats. *J Cell Biol.* 2004;164(1):25-33.
- 766 85. Valgardsdottir R, Chiodi I, Giordano M, Rossi A, Bazzini S, Ghigna C, Riva S, Biamonti G.  
767 Transcription of Satellite III non-coding RNAs is a general stress response in human cells.  
768 *Nucleic Acids Res.* 2008;36(2):423-34.
- 769 86. Rizzi N, Denegri M, Chiodi I, Corioni M, Valgardsdottir R, Cobianchi F, Riva S, Biamonti G.  
770 Transcriptional activation of a constitutive heterochromatic domain of the human genome in  
771 response to heat shock. *Mol Biol Cell.* 2004;15(2):543-51.

- 772 87. Li Q, Zhang Y, Fu J, Han L, Xue L, Lv C, Wang P, Li G, Tong T. FOXA1 mediates p16(INK4a)  
773 activation during cellular senescence. *EMBO J.* 2013;32(6):858-73.
- 774 88. Hirata K, Takakura Y, Shibazaki M, Morii M, Honda T, Oshima M, Aoyama K, Iwama A,  
775 Nakayama Y, Takano H, et al. Forkhead box protein A1 confers resistance to transforming  
776 growth factor-beta-induced apoptosis in breast cancer cells through inhibition of Smad3 nuclear  
777 translocation. *J Cell Biochem.* 2018.
- 778 89. Palagani A, Op de Beeck K, Naulaerts S, Diddens J, Sekhar Chirumamilla C, Van Camp G,  
779 Laukens K, Heyninck K, Gerlo S, Mestdagh P, et al. Ectopic microRNA-150-5p transcription  
780 sensitizes glucocorticoid therapy response in MM1S multiple myeloma cells but fails to  
781 overcome hormone therapy resistance in MM1R cells. *PLoS One.* 2014;9(12):e113842.
- 782 90. Logie E, Chirumamilla CS, Perez-Novo C, Shaw P, Declerck K, Palagani A, Rangarajan S,  
783 Cuypers B, De Neuter N, Mobashar Hussain Urf Turabe F, et al. Covalent Cysteine Targeting of  
784 Bruton's Tyrosine Kinase (BTK) Family by Withaferin-A Reduces Survival of Glucocorticoid-  
785 Resistant Multiple Myeloma MM1 Cells. *Cancers (Basel).* 2021;13(7).
- 786 91. FastQC. 2015
- 787 92. Dobin A, Davis CA, Schlesinger F, Drenkow J, Zaleski C, Jha S, Batut P, Chaisson M, Gingeras  
788 TR. STAR: ultrafast universal RNA-seq aligner. *Bioinformatics.* 2013;29(1):15-21.
- 789 93. Love MI, Huber W, Anders S. Moderated estimation of fold change and dispersion for RNA-seq  
790 data with DESeq2. *Genome Biol.* 2014;15(12):550.
- 791 94. Zhang X, Du L, Qiao Y, Zhang X, Zheng W, Wu Q, Chen Y, Zhu G, Liu Y, Bian Z, et al.  
792 Ferroptosis is governed by differential regulation of transcription in liver cancer. *Redox Biol.*  
793 2019;24:101211.
- 794 95. Rueden CT, Schindelin J, Hiner MC, DeZonia BE, Walter AE, Arena ET, Eliceiri KW. ImageJ2:  
795 ImageJ for the next generation of scientific image data. *BMC Bioinformatics.* 2017;18(1):529.
- 796 96. Pachkov M, Erb I, Molina N, van Nimwegen E. SwissRegulon: a database of genome-wide  
797 annotations of regulatory sites. *Nucleic Acids Res.* 2007;35(Database issue):D127-31.
- 798 97. Chen EY, Xu H, Gordonov S, Lim MP, Perkins MH, Ma'ayan A. Expression2Kinases: mRNA  
799 profiling linked to multiple upstream regulatory layers. *Bioinformatics.* 2012;28(1):105-11.
- 800 98. Skene PJ, Henikoff JG, Henikoff S. Targeted in situ genome-wide profiling with high efficiency  
801 for low cell numbers. *Nat Protoc.* 2018;13(5):1006-19.
- 802 99. Li H. Aligning sequence reads, clone sequences and assembly contigs with BWA-MEM. 2013.
- 803 100. Quinlan AR and Hall IM. BEDTools: a flexible suite of utilities for comparing genomic features.  
804 *Bioinformatics.* 2010;16:841-842.
- 805 101. Lawrence M, Huber W, Pagès H, Aboyoun P, Carlson M, Gentleman R, Morgan M, Carey V.  
806 Software for computing and annotating genomic ranges. *PLoS Computational Biology.* 2013;9.
- 807 102. Schep AN, Wu B, Buenrostro JD, Greenleaf WJ. chromVAR: interfering transcription-factor-  
808 associated accessibility from single-cell epigenomic data. *Nature Methods.* 2017;14:975-978.

809 103. Zhang H, Meltzer P, Davis S. RCircos: an R package for Circos 2D track plots. BMC  
810 Bioinformatics. 2013;14:244.
